# Supplementary material for: Lysophosphatidic acid induces YAP-promoted proliferation of human corneal endothelial cells via PI3K and ROCK pathways
Source: PubMed Central journal article supplement — Mol Ther Methods Clin Dev. 2015 Apr 29;2:15014–. doi: 10.1038/mtm.2015.14 (PMC4445000; doi:10.1038/mtm.2015.14), 2015-04-29

**Figure S2.** LPA-induced B4G12 cell proliferation is mediated by PI3K and ROCK pathway.

The effects of ROCK and PI3K phosphatase inhibitors on cell cycle mediators were measured by Western blotting. Post-confluent Day 4 B4G12 cells was serum-starved for 24 hours, followed by pretreatment with LY294002 (PI3K inhibitor, 20  $\mu$ M), PD98059 (ERK1/2 inhibitor, 20  $\mu$ M), SB203580 (p38 inhibitor, 20  $\mu$ M) or Y27632 (ROCK inhibitor, 20  $\mu$ M) for 2 hours and was then treated with LPA for 4 hours. The cell cycle mediators (including cyclin D1, p27<sup>KIP1</sup> and p21<sup>CIP1</sup>) were blotted using the total cell lysates, and GAPDH was blotted as a loading control.

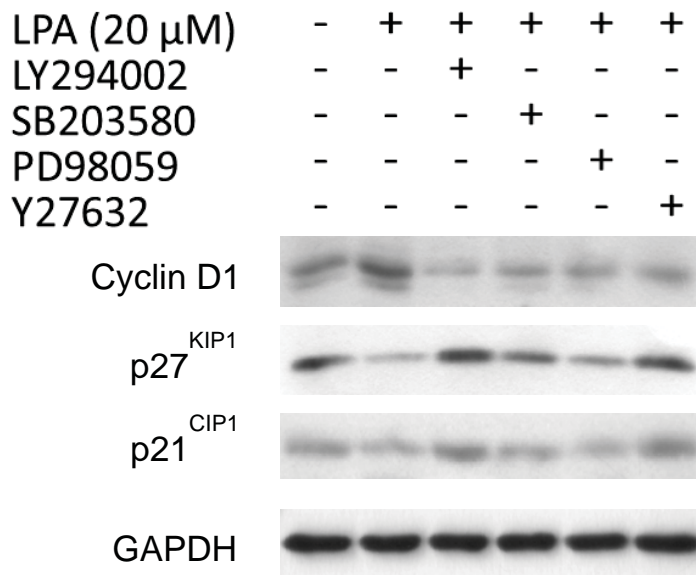

Supplement: mtm201514-s2.pdf [file mtm201514-s2.pdf]
